# Supplementary material for: The importance of transport property studies for battery electrolytes: revisiting the transport properties of lithium–N-methyl-N-propylpyrrolidinium bis(fluorosulfonyl)imide mixtures
Source: Royal Society of Chemistry journal article supplement (doi:10.1039/c7cp01272a), 2017-01-01
Supplement: c7cp01272a1.pdf [file c7cp01272a1.pdf]

## Supporting Information for

# The Importance of Transport Property Studies for Battery Electrolytes: Revisiting the Transport Properties of Lithium – *N*-Methyl-*N*-propylpyrrolidinium Bis(fluorosulfonyl)imide Mixtures.

*Thomas Rüther,<sup>a\*</sup> Mitsuhiro Kanakubo,<sup>b</sup> Adam S. Best<sup>c</sup> and Kenneth R. Harris<sup>d\*</sup>*

---

<sup>a</sup> CSIRO Energy, Clayton, VIC 3169, Australia.

<sup>b</sup> National Institute of Advanced Industrial Science and Technology, 4-2-1 Nigatake, Miyagino-ku, Sendai 983-8551, Japan

<sup>c</sup> CSIRO Manufacturing, Clayton, VIC 3169, Australia

<sup>d</sup> School of Physical, Environmental and Mathematical Sciences, The University of New South Wales, Australian Defence Force Academy, PO Box 7916, Canberra BC, ACT 2610, Australia.

\*Corresponding Author

E-mail: [k.harris@adfa.edu.au](mailto:k.harris@adfa.edu.au), [Thomas.Ruether@csiro.au](mailto:Thomas.Ruether@csiro.au),

**Table S1. Densities  $\rho$  of [Pyr<sub>13</sub>][FSI] and {Li[FSI]+[Pyr<sub>13</sub>][FSI]} Mixtures**

|                                         | [Pyr <sub>13</sub> ][FSI]<br>sample A,<br>(CoorsTek) | [Pyr <sub>13</sub> ][FSI]<br>sample B,<br>(Kanto) | {Li[FSI] + [Pyr <sub>13</sub> ][FSI]}<br>mixtures |        |
|-----------------------------------------|------------------------------------------------------|---------------------------------------------------|---------------------------------------------------|--------|
| $m_1 / \text{mol} \cdot \text{kg}^{-1}$ | 0                                                    | 0                                                 | 0.4811                                            | 0.9622 |
| $x_1$                                   | 0                                                    | 0                                                 | 0.1292                                            | 0.2288 |
| $\theta / ^\circ\text{C}$               | $\rho / \text{g} \cdot \text{cm}^{-3}$               |                                                   |                                                   |        |
| 0.00                                    | 1.3597                                               | 1.3591                                            | 1.4066                                            | 1.4474 |
| 5.00                                    | 1.3556                                               | 1.3550                                            | 1.4023                                            | 1.4429 |
| 10.00                                   | 1.3515                                               | 1.3510                                            | 1.3981                                            | 1.4384 |
| 15.00                                   | 1.3474                                               | 1.3469                                            | 1.3939                                            | 1.4340 |
| 20.00                                   | 1.3433                                               | 1.3429                                            | 1.3896                                            | 1.4297 |
| 20.00                                   | 1.3434                                               | -                                                 |                                                   | -      |
| 25.00                                   | 1.3394                                               | 1.3388                                            | 1.3855                                            | 1.4254 |
| 30.00                                   | 1.3354                                               | 1.3348                                            | 1.3814                                            | 1.4212 |
| 40.00                                   | 1.3275                                               | 1.3268                                            | 1.3732                                            | 1.4127 |
| 50.00                                   | 1.3196                                               | 1.3190                                            | 1.3650                                            | 1.4043 |
| 60.00                                   | 1.3118                                               | 1.3113                                            | 1.3568                                            | 1.3960 |
| 70.00                                   | 1.3040                                               | 1.3036                                            | 1.3488                                            | 1.3878 |
| 80.00                                   | 1.2964                                               | 1.2961                                            | 1.3410                                            | 1.3797 |
| 90.00                                   | 1.2889                                               | 1.2886                                            | 1.3332                                            | 1.3719 |

<sup>a</sup> Standard uncertainties  $u$  are  $u(T) = 0.01$  K,  $u(\rho) = 0.0003$  g·cm<sup>-3</sup> for the DMA5000 measurements,<sup>25</sup> but see Table 2 of the main text for  $u_r$  values based on purities.

**Table S2. Viscosities  $\eta$  of [Pyr<sub>13</sub>][FSI] and {Li[FSI]+[Pyr<sub>13</sub>][FSI]} Mixtures**

|                                         | [Pyr <sub>13</sub> ][FSI]<br>sample A,<br>(Coorstek) | [Pyr <sub>13</sub> ][FSI]<br>sample B,<br>(Kanto) | {Li[FSI] + [Pyr <sub>13</sub> ][FSI]}<br>mixtures |        |
|-----------------------------------------|------------------------------------------------------|---------------------------------------------------|---------------------------------------------------|--------|
| $m_1 / \text{mol} \cdot \text{kg}^{-1}$ | 0                                                    | 0                                                 | 0.4811                                            | 0.9622 |
| $x_1$                                   | 0                                                    | 0                                                 | 0.1292                                            | 0.2288 |
| $\theta / ^\circ\text{C}$               | $\eta / \text{mPa} \cdot \text{s}$                   |                                                   |                                                   |        |
| 0.00                                    | 107.9                                                | 107.9                                             | 182.4                                             | 305.5  |
| 5.00                                    | 86.43                                                | 86.69                                             | 141.7                                             | 230.2  |
| 10.00                                   | 70.74                                                | 70.72                                             | 112.3                                             | 177.3  |
| 15.00                                   | 58.42                                                | 58.47                                             | 90.48                                             | 139.3  |
| 20.00                                   | 48.93                                                | 48.95                                             | 73.91                                             | 111.3  |
| 20.00                                   | 48.94                                                | 48.94                                             | 73.92                                             | 111.2  |
| 20.00                                   | 48.91                                                | -                                                 | -                                                 | -      |
| 25.00                                   | 41.35                                                | 41.39                                             | 61.22                                             | 90.23  |
| 30.00                                   | 35.27                                                | 35.39                                             | 51.40                                             | 74.23  |
| 40.00                                   | 26.39                                                | 26.55                                             | 37.24                                             | 52.13  |
| 50.00                                   | 20.45                                                | 20.53                                             | 28.01                                             | 38.16  |
| 60.00                                   | 16.07                                                | 16.28                                             | 21.69                                             | 28.90  |
| 70.00                                   | 13.11                                                | 13.19                                             | 17.22                                             | 22.52  |
| 80.00                                   | 10.80                                                | 10.88                                             | 13.98                                             | 17.97  |
| 90.00                                   | 9.078                                                | 9.121                                             | 11.53                                             | 14.64  |

<sup>a</sup> Standard uncertainty  $u$  is  $u(T) = 0.01$  K, relative expanded uncertainty  $U_r$  is  $100 \cdot U_r(\eta)$  ( $k = 2$ ) = 2.

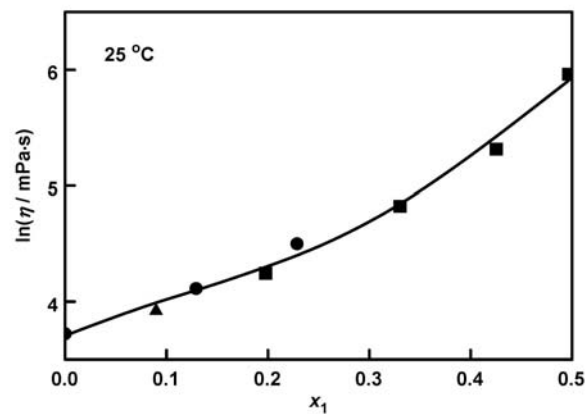

**Figure S1.** Viscosities of {Li[FSI]+[PyT<sub>13</sub>][FSI]} mixtures at 25 °C. Symbols: ●, this work; ▲, Hayamizu *et al.*<sup>27</sup>; ■,

Yoon.<sup>19</sup>  $\ln(\eta/\text{mPa}\cdot\text{s}) = (3.7045 \pm 0.068) + (3.43 \pm 1.2) x_1 - (4.75 \pm 6.0) x_1^2 + (13.89 \pm 8.1) x_1^3$ ,  $100 \cdot u_r = 6.8$ .

**Table S3. Conductivities  $\kappa$  and Molar Conductivities  $\Lambda$  of [Pyr<sub>13</sub>][FSI] and {Li[FSI]+[Pyr<sub>13</sub>][FSI]} Mixtures<sup>a</sup>**

| [Pyr <sub>13</sub> ][FSI] sample A, (Coorstek) |                                     |                                                                 | [Pyr <sub>13</sub> ][FSI] sample B, (Kanto) |                                     |                                                                 | {Li[FSI] + [Pyr <sub>13</sub> ][FSI]} mixtures (Coorstek) |                                     |                                                                 |                                     |                                                                 |
|------------------------------------------------|-------------------------------------|-----------------------------------------------------------------|---------------------------------------------|-------------------------------------|-----------------------------------------------------------------|-----------------------------------------------------------|-------------------------------------|-----------------------------------------------------------------|-------------------------------------|-----------------------------------------------------------------|
| $m_1/\text{mol}\cdot\text{kg}^{-1}$            | 0                                   |                                                                 |                                             | 0                                   |                                                                 |                                                           | 0.4811                              |                                                                 | 0.9622                              |                                                                 |
| $x_1$                                          | 0                                   |                                                                 |                                             | 0                                   |                                                                 |                                                           | 0.1292                              |                                                                 | 0.2288                              |                                                                 |
| $\theta/^\circ\text{C}$                        | $\kappa/\text{S}\cdot\text{m}^{-1}$ | $\Lambda$<br>/ $\mu\text{S}\cdot\text{m}^2\cdot\text{mol}^{-1}$ | $\theta/^\circ\text{C}$                     | $\kappa/\text{S}\cdot\text{m}^{-1}$ | $\Lambda$<br>/ $\mu\text{S}\cdot\text{m}^2\cdot\text{mol}^{-1}$ | $\theta/^\circ\text{C}$                                   | $\kappa/\text{S}\cdot\text{m}^{-1}$ | $\Lambda$<br>/ $\mu\text{S}\cdot\text{m}^2\cdot\text{mol}^{-1}$ | $\kappa/\text{S}\cdot\text{m}^{-1}$ | $\Lambda$<br>/ $\mu\text{S}\cdot\text{m}^2\cdot\text{mol}^{-1}$ |
| 0.01                                           | 0.3679                              | 83.47                                                           | 0.00                                        | 0.3737                              | 84.79                                                           | 0.00                                                      | 0.2031                              | 42.27                                                           | 0.1249                              | 24.21                                                           |
| 4.99                                           | 0.4496                              | 102.3                                                           | 5.00                                        | 0.4564                              | 103.9                                                           | 5.00                                                      | 0.2564                              | 53.52                                                           | 0.1627                              | 31.64                                                           |
| 10.00                                          | 0.5418                              | 123.7                                                           | 10.00                                       | 0.5489                              | 125.3                                                           | 10.00                                                     | 0.3183                              | 66.63                                                           | 0.2074                              | 40.47                                                           |
| 14.99                                          | 0.6425                              | 147.1                                                           | 15.00                                       | 0.6493                              | 148.7                                                           | 15.00                                                     | 0.3881                              | 81.49                                                           | 0.2596                              | 50.79                                                           |
| 20.00                                          | 0.7534                              | 173.0                                                           | 20.00                                       | 0.7628                              | 175.2                                                           | 20.00                                                     | 0.4625                              | 97.40                                                           | 0.3196                              | 62.73                                                           |
| 25.00                                          | 0.8766                              | 201.9                                                           | 25.00                                       | 0.8850                              | 203.9                                                           | 25.00                                                     | 0.5539                              | 117.0                                                           | 0.3867                              | 76.13                                                           |
| 25.01                                          | 0.8765                              | 201.9                                                           | 25.00                                       | 0.8891                              | 204.8                                                           | 25.00                                                     | 0.5529                              | 116.8                                                           | 0.3871                              | 76.21                                                           |
| 30.00                                          | 1.012                               | 233.8                                                           | 30.00                                       | 1.010                               | 233.4                                                           | 30.00                                                     | 0.6475                              | 137.2                                                           | 0.4624                              | 91.31                                                           |
| 40.00                                          | 1.308                               | 303.9                                                           | 40.00                                       | 1.318                               | 306.3                                                           | 40.00                                                     | 0.8688                              | 185.2                                                           | 0.6370                              | 126.5                                                           |
| 50.00                                          | 1.642                               | 383.8                                                           | 50.00                                       | 1.650                               | 385.8                                                           | 50.00                                                     | 1.123                               | 240.7                                                           | 0.8441                              | 168.7                                                           |
| 60.00                                          | 1.992                               | 468.4                                                           | 60.00                                       | 1.997                               | 469.6                                                           | 60.00                                                     | 1.402                               | 302.5                                                           | 1.085                               | 218.0                                                           |
| 70.00                                          | 2.387                               | 564.6                                                           | 69.99                                       | 2.356                               | 557.2                                                           | 70.00                                                     | 1.724                               | 374.0                                                           | 1.348                               | 272.6                                                           |
| 79.99                                          | 2.835                               | 674.5                                                           | 80.00                                       | 2.748                               | 653.7                                                           | 80.01                                                     | 2.073                               | 452.4                                                           | 1.663                               | 338.1                                                           |

<sup>a</sup> Standard uncertainty  $u$  is  $u(T) = 0.01$  K, relative expanded uncertainty  $U_r$  is  $100 \cdot U_r(\kappa)$  ( $k = 2$ ) = 2.

**Table S4(a). PGSE NMR Self-diffusion Coefficients,  $D_{Si}$  of [Pyr<sub>13</sub>][FSI] and {Li[FSI]+[Pyr<sub>13</sub>][FSI]} Mixtures<sup>a</sup>**

| $D_{Si}([Pyr_{13}][FSI])$ , sample B |                                                            |                                                            |                 | $D_{Si} \{Li[FSI]+[Pyr_{13}][FSI]\}$                           |                                                                  |                                                            |                                  |                                    |                                                                |                                                                  |                                                            |                                  |                                    |
|--------------------------------------|------------------------------------------------------------|------------------------------------------------------------|-----------------|----------------------------------------------------------------|------------------------------------------------------------------|------------------------------------------------------------|----------------------------------|------------------------------------|----------------------------------------------------------------|------------------------------------------------------------------|------------------------------------------------------------|----------------------------------|------------------------------------|
| $m_1$<br>/mol·kg <sup>-1</sup>       | 0                                                          |                                                            |                 | 0.4811                                                         |                                                                  |                                                            |                                  |                                    | 0.9622                                                         |                                                                  |                                                            |                                  |                                    |
| $x_1$                                | 0                                                          |                                                            |                 | 0.1292                                                         |                                                                  |                                                            |                                  |                                    | 0.2288                                                         |                                                                  |                                                            |                                  |                                    |
| $\theta/^\circ C$                    | $10^{12} \cdot D_{S+}$<br>/m <sup>2</sup> ·s <sup>-1</sup> | $10^{12} \cdot D_{S-}$<br>/m <sup>2</sup> ·s <sup>-1</sup> | $D_{S+}/D_{S-}$ | $10^{12} \cdot D_{S[Li]+}$<br>/m <sup>2</sup> ·s <sup>-1</sup> | $10^{12} \cdot D_{S[Pyri]+}$<br>/m <sup>2</sup> ·s <sup>-1</sup> | $10^{12} \cdot D_{S-}$<br>/m <sup>2</sup> ·s <sup>-1</sup> | $D_{S[Li]+}$<br>/D <sub>S-</sub> | $D_{S[Pyri]+}$<br>/D <sub>S-</sub> | $10^{12} \cdot D_{S[Li]+}$<br>/m <sup>2</sup> ·s <sup>-1</sup> | $10^{12} \cdot D_{S[Pyri]+}$<br>/m <sup>2</sup> ·s <sup>-1</sup> | $10^{12} \cdot D_{S-}$<br>/m <sup>2</sup> ·s <sup>-1</sup> | $D_{S[Li]+}$<br>/D <sub>S-</sub> | $D_{S[Pyri]+}$<br>/D <sub>S-</sub> |
| 5.00                                 | 14.0                                                       | 17.3                                                       | 0.81            | 7.50                                                           | 8.98                                                             | 10.3                                                       | 0.73                             | 0.87                               | 4.69                                                           | 5.31                                                             | 6.00                                                       | 0.78                             | 0.89                               |
| 15.00                                | 21.3                                                       | 26.4                                                       | 0.81            | 12.0                                                           | 14.2                                                             | 16.2                                                       | 0.74                             | 0.88                               | 8.14                                                           | 9.25                                                             | 10.2                                                       | 0.79                             | 0.90                               |
| 25.00                                | 31.0                                                       | 37.7                                                       | 0.82            | 17.9                                                           | 22.0                                                             | 24.0                                                       | 0.75                             | 0.92                               | 13.0                                                           | 14.8                                                             | 16.0                                                       | 0.81                             | 0.93                               |
| 40.00                                | 51.0                                                       | 61.6                                                       | 0.83            | 30.4                                                           | 37.1                                                             | 41.1                                                       | 0.74                             | 0.90                               | 23.0                                                           | 26.9                                                             | 28.5                                                       | 0.81                             | 0.95                               |
| 60.00                                | 83.9                                                       | 99.9                                                       | 0.84            | 55.0                                                           | 67.8                                                             | 73.8                                                       | 0.75                             | 0.92                               | 42.5                                                           | 50.8                                                             | 52.7                                                       | 0.81                             | 0.96                               |
| 80.00                                | 129                                                        | 152                                                        | 0.85            | 86.0                                                           | 108                                                              | 117                                                        | 0.73                             | 0.92                               | 68.2                                                           | 84.3                                                             | 84.7                                                       | 0.81                             | 1.00                               |

<sup>a</sup> Standard uncertainty  $u$  is  $u(T) = 0.01$  K, relative expanded uncertainty  $U_r$  is  $100 \cdot U_r(D_{Si})$  ( $k = 2$ ) = 2.

**Table S4(b). Steady Gradient Spin-echo NMR Self-diffusion Coefficients,  $D_{Si}$  of {Li[FSI]+[Pyr<sub>13</sub>][FSI]} Mixtures<sup>a</sup>**

| $D_{Si}$ (Li[FSI]+[Pyr <sub>13</sub> ][FSI]) |                                                                   |              |                                                                   |              |                                                      |
|----------------------------------------------|-------------------------------------------------------------------|--------------|-------------------------------------------------------------------|--------------|------------------------------------------------------|
| $m_1$ /mol·kg <sup>-1</sup>                  | 0.4811                                                            | 0.9622       |                                                                   |              |                                                      |
| $x_1$                                        | 0.1292                                                            | 0.2288       |                                                                   |              |                                                      |
| $\theta$ /°C                                 | $10^{12} \cdot D_{S[Pyri]^+}$<br>/m <sup>2</sup> ·s <sup>-1</sup> | $\theta$ /°C | $10^{12} \cdot D_{S[Pyri]^+}$<br>/m <sup>2</sup> ·s <sup>-1</sup> | $\theta$ /°C | $10^{12} \cdot D_S$ /m <sup>2</sup> ·s <sup>-1</sup> |
| 20.09                                        | 17.3                                                              | 25.12        | 14.5                                                              | 25.22        | 15.9                                                 |
| 39.99                                        | 36.5                                                              | 30.09        | 17.6                                                              | 29.77        | 18.8                                                 |
| 49.77                                        | 48.9                                                              | 30.09        | 17.7                                                              | 30.14        | 18.8                                                 |
| 59.82                                        | 66.2                                                              | 49.87        | 36.9                                                              | 30.15        | 18.9                                                 |
| 59.83                                        | 66.0                                                              | 70.64        | 66.1                                                              | 39.86        | 27.4                                                 |
| 79.82                                        | 107                                                               | 79.83        | 82.8                                                              | 40.12        | 28.5                                                 |
| 79.84                                        | 106                                                               | 79.83        | 80.6                                                              | 40.13        | 27.1                                                 |
|                                              |                                                                   | 79.95        | 81.5                                                              | 49.82        | 40.4                                                 |
|                                              |                                                                   | 80.02        | 81.8                                                              | 49.86        | 37.7                                                 |
|                                              |                                                                   |              |                                                                   | 59.90        | 51.4                                                 |
|                                              |                                                                   |              |                                                                   | 70.51        | 71.6                                                 |
|                                              |                                                                   |              |                                                                   | 70.52        | 71.0                                                 |
|                                              |                                                                   |              |                                                                   | 80.12        | 85.5                                                 |

<sup>a</sup> Standard uncertainty  $u$  is  $u(T) = 0.01$  K, relative expanded uncertainty  $U_r$  is  $100 \cdot U_r(D_{Si})$  ( $k = 2$ ) = 3.

<sup>b</sup> In the case of the cation, experiments were performed by varying only the gradient, through positive and negative ranges, at constant  $\tau$ , the 90°-180° rf pulse spacing, due to the shortness of  $T_2$ , as is usual for ionic liquids. For the anion, the longer  $T_2$  allowed variable  $\tau$  runs, at constant field gradient,  $\pm g$  as well. However the low signal to noise ratios produced anomalously low  $D_S$  values for the majority of the constant  $\tau$  experiments, and so only variable  $\tau$  results are reported. The problem was worse for the 9% mixture in that both types of experiment produced inconsistent values: hence no data are reported for the anion in this case.

**Table S5. Velocity Correlation ( $f_{ij}$ ), and Distinct Diffusion ( $D_{ij}^d$ ) Coefficients, Laity Resistance Coefficients ( $r_{ij}$ ), and Nernst-Einstein  $\Delta$  for [Pyr<sub>13</sub>][FSI]**

| $T/K$           | $f_{++}^a$ | $f_-$ | $f_{+-}$ | $D_{++}^{d\ b}$ | $D_{--}^d$ | $D_{+-}^d$ | $\Delta$                | $r_{++}^c$ | $r_-$ | $r_{+-}$ | $r_{++}^2/(r_{++}r_-)$ |
|-----------------|------------|-------|----------|-----------------|------------|------------|-------------------------|------------|-------|----------|------------------------|
| 273.15          | -0.879     | -2.28 | -1.13    | -7.75           | -20.1      | -9.93      | 0.163                   | 196        | 112   | 222      | 2.2                    |
| 278.15          | -1.17      | -2.91 | -1.41    | -10.3           | -25.6      | -12.4      | 0.178                   | 153        | 87.5  | 181      | 2.5                    |
| 283.15          | -1.51      | -3.66 | -1.74    | -13.3           | -32.1      | -15.2      | 0.191                   | 121        | 69.3  | 150      | 2.7                    |
| 288.15          | -1.93      | -4.53 | -2.12    | -16.8           | -39.6      | -18.5      | 0.203                   | 97.9       | 55.9  | 126      | 2.9                    |
| 293.15          | -2.41      | -5.52 | -2.54    | -21.0           | -48.1      | -22.2      | 0.213                   | 80.2       | 45.8  | 107      | 3.1                    |
| 298.15          | -2.96      | -6.64 | -3.02    | -25.7           | -57.7      | -26.3      | 0.222                   | 66.7       | 38.1  | 91.7     | 3.3                    |
| 303.15          | -3.58      | -7.90 | -3.56    | -31.0           | -68.4      | -30.8      | 0.229                   | 56.2       | 32.2  | 79.5     | 3.5                    |
| 313.15          | -5.04      | -10.8 | -4.80    | -43.4           | -93.0      | -41.3      | 0.240                   | 41.5       | 23.9  | 61.2     | 3.8                    |
| 323.15          | -6.75      | -14.2 | -6.29    | -57.8           | -122       | -53.8      | 0.245                   | 32.1       | 18.7  | 48.5     | 3.9                    |
| 333.15          | -8.70      | -18.1 | -8.02    | -74.0           | -154       | -68.2      | 0.246                   | 25.8       | 15.3  | 39.4     | 4.0                    |
| 343.15          | -10.8      | -22.4 | -10.0    | -91.5           | -189       | -84.7      | 0.242                   | 21.5       | 13.0  | 32.7     | 3.8                    |
| 353.15          | -13.1      | -27.0 | -12.3    | -110            | -227       | -103       | 0.236                   | 18.4       | 11.4  | 27.7     | 3.6                    |
| $100 \cdot u_r$ | 6          | 4     | 1        | 6               | 4          | 1          | <b>0.03<sup>d</sup></b> | 6          | 3     | 1        |                        |

Units: <sup>a</sup>  $f_{ij}$ :  $10^{-15} \cdot \text{m}^5/(\text{mol} \cdot \text{s})$ .    <sup>b</sup>  $D_{ij}^d$ :  $10^{-12} \cdot \text{m}^2/\text{s}$ .    <sup>c</sup>  $r_{ij}$ :  $10^{12} \cdot \text{J} \cdot \text{s} \cdot \text{m}^{-2} \cdot \text{mol}^{-1}$     <sup>d</sup> Actual uncertainty, not a percentage.



**Table S6. Apparent Molar Volumes of {Li[FSI]+[Pyr<sub>13</sub>][FSI]} Mixtures**

| $V_{\phi 1} \{ \text{Li[FSI]} (1) - [\text{Pyr}_{13}][\text{FSI}] (0) \}$ |                                                      |                           |                                                  |                           |                                                  |
|---------------------------------------------------------------------------|------------------------------------------------------|---------------------------|--------------------------------------------------|---------------------------|--------------------------------------------------|
| $m_1 / \text{mol} \cdot \text{kg}^{-1}$                                   | 0.3605                                               | 0.4811                    |                                                  | 0.9622                    |                                                  |
| $x_1$                                                                     | 0.1                                                  | 0.1292                    |                                                  | 0.2288                    |                                                  |
| $\theta / ^\circ\text{C}$                                                 | $V_{\phi 1} / \text{cm}^2 \cdot \text{mol}^{-1}{}^a$ | $\theta / ^\circ\text{C}$ | $V_{\phi 1} / \text{cm}^2 \cdot \text{mol}^{-1}$ | $\theta / ^\circ\text{C}$ | $V_{\phi 1} / \text{cm}^2 \cdot \text{mol}^{-1}$ |
| 10.0                                                                      | 94.2                                                 | 0.0                       | 82.0                                             | 0.0                       | 82.9                                             |
| 15.0                                                                      | 94.5                                                 | 5.0                       | 82.4                                             | 5.0                       | 83.3                                             |
| 20.0                                                                      | 94.8                                                 | 10.0                      | 82.6                                             | 10.0                      | 83.6                                             |
| 25.0                                                                      | 95.1                                                 | 15.0                      | 82.8                                             | 15.0                      | 83.9                                             |
| 30.0                                                                      | 95.4                                                 | 20.0                      | 83.2                                             | 20.0                      | 84.2                                             |
| 35.0                                                                      | 95.7                                                 | 25.0                      | 83.4                                             | 25.0                      | 84.4                                             |
| 40.0                                                                      | 95.9                                                 | 30.0                      | 83.6                                             | 30.0                      | 84.7                                             |
| 45.0                                                                      | 96.2                                                 | 40.0                      | 84.1                                             | 40.0                      | 85.2                                             |
| 50.0                                                                      | 96.6                                                 | 50.0                      | 84.7                                             | 50.0                      | 85.7                                             |
| 55.0                                                                      | 96.9                                                 | 60.0                      | 85.3                                             | 60.0                      | 86.2                                             |
| 60.0                                                                      | 97.2                                                 | 70.0                      | 85.9                                             | 70.0                      | 86.7                                             |
| 65.0                                                                      | 97.5                                                 | 80.0                      | 86.3                                             | 80.0                      | 87.2                                             |
| 70.0                                                                      | 97.8                                                 | 90.0                      | 86.7                                             | 90.0                      | 87.6                                             |
| 75.0                                                                      | 98.1                                                 |                           |                                                  |                           |                                                  |
| 80.0                                                                      | 98.4                                                 |                           |                                                  |                           |                                                  |
| $U / \text{cm}^3 \cdot \text{mol}^{-1}{}^b$                               | 1.7<br>or 7 <sup>b</sup>                             |                           | 0.5                                              |                           | 0.2                                              |

<sup>a</sup> Calculated from the data of Hayamizu *et al.*<sup>27</sup>

<sup>b</sup>  $U$  is the relative expanded uncertainty. This is calculated assuming an uncertainty of 0.05% in the molarities for both data sets (Hayamizu *et al.* did not give a value), and 0.0002 g·cm<sup>-3</sup> in the densities, since both the Hayamizu group and ourselves used the same vibrating tube densimeter model. However Hayamizu *et al.* conservatively listed values to only 3 decimal places, which gives  $U = 7$  cm<sup>3</sup>/mol.  $U$  increases with decreasing  $m_1$ .

**Table S7.** Nernst-Einstein Deviation Parameters  $\Delta$  for {Li[FSI] +[Pyr<sub>13</sub>][FSI]} Mixtures.

| $T/^\circ\text{C}$ | $x_1 = 0$<br>(sample A) | $x_1 = 0$<br>(sample B) | $x_1 = 0.1^a$ | $x_1 = 0.1292$ | $x_1 = 0.2288$ |
|--------------------|-------------------------|-------------------------|---------------|----------------|----------------|
| 0                  | 0.163                   | 0.156                   | 0.253         | 0.277          | 0.295          |
| 5                  | 0.178                   | 0.170                   | 0.237         | 0.289          | 0.302          |
| 10                 | 0.191                   | 0.183                   | 0.227         | 0.300          | 0.309          |
| 15                 | 0.203                   | 0.196                   | 0.222         | 0.310          | 0.316          |
| 20                 | 0.213                   | 0.207                   | 0.221         | 0.319          | 0.324          |
| 25                 | 0.222                   | 0.217                   | 0.223         | 0.327          | 0.331          |
| 30                 | 0.229                   | 0.225                   | 0.228         | 0.333          | 0.337          |
| 40                 | 0.240                   | 0.239                   | 0.244         | 0.344          | 0.348          |
| 50                 | 0.245                   | 0.249                   | 0.266         | 0.350          | 0.356          |
| 60                 | 0.246                   | 0.254                   | 0.289         | 0.352          | 0.361          |
| 70                 | 0.242                   | 0.255                   | 0.314         | 0.351          | 0.362          |
| 80                 | 0.236                   | 0.253                   | 0.339         | 0.347          | 0.361          |

<sup>a</sup> Calculated from the data of Hayamizu *et al.*<sup>27</sup>

**Table S8.** Coefficients of Eqn (14),  $D_{si} = \exp(a + b m_1)$ . (Fig 18).

| Property                                                            | $T/^\circ\text{C}$ | $a$                  | $b/(\text{kg}\cdot\text{mol}^{-1})$ | average<br>devn/%                                            | $a$                  | $b/(\text{kg}\cdot\text{mol}^{-1})$ |    |
|---------------------------------------------------------------------|--------------------|----------------------|-------------------------------------|--------------------------------------------------------------|----------------------|-------------------------------------|----|
| $m_1 = 0$ to 0.9622<br>(this work)                                  |                    |                      |                                     | $m_1 < 3.243$<br>(data of Yoon <i>et al.</i> <sup>19</sup> ) |                      |                                     |    |
| $D_s[\text{Pyr}]^+$<br>$/10^{-12}\cdot\text{m}^2\cdot\text{s}^{-1}$ | 5                  | $2.635 \pm$<br>0.018 | $-0.9871 \pm$<br>0.029              | 1.1                                                          |                      |                                     |    |
|                                                                     | 25                 | $3.452 \pm$<br>0.018 | $-0.7819 \pm$<br>0.029              | 1.1                                                          | $3.554 \pm$<br>0.14  | $-0.6174 \pm$<br>0.069              | 12 |
|                                                                     | 40                 | $3.934 \pm$<br>0.018 | $-0.6600 \pm$<br>0.029              | 1.1                                                          | $3.998 \pm$<br>0.12  | $-0.5521 \pm$<br>0.062              | 11 |
|                                                                     | 60                 | $4.450 \pm$<br>0.018 | $-0.5300 \pm$<br>0.029              | 1.1                                                          | $4.528 \pm$<br>0.11  | $-0.4748 \pm$<br>0.054              | 10 |
|                                                                     | 80                 | $4.856 \pm$<br>0.018 | $-0.4280 \pm$<br>0.030              | 1.1                                                          |                      |                                     |    |
| $D_s[\text{Li}]^+$<br>$/10^{-12}\cdot\text{m}^2\cdot\text{s}^{-1}$  | 5                  | $2.491 \pm$<br>0.024 | $-0.9738 \pm$<br>0.039              | 1.5                                                          |                      |                                     |    |
|                                                                     | 25                 | $3.273 \pm$<br>0.009 | $-0.7587 \pm$<br>0.015              | 0.6                                                          | $3.170 \pm$<br>0.25  | $-0.540 \pm$<br>0.11                | 12 |
|                                                                     | 40                 | $3.751 \pm$<br>0.007 | $-0.6512 \pm$<br>0.011              | 0.4                                                          | $3.623 \pm$<br>0.22  | $-0.473 \pm$<br>0.10                | 11 |
|                                                                     | 60                 | $4.279 \pm$<br>0.013 | $-0.5580 \pm$<br>0.021              | 0.8                                                          | $4.165 \pm$<br>0.19  | $-0.3927 \pm$<br>0.086              | 9  |
|                                                                     | 80                 | $4.716 \pm$<br>0.027 | $-0.5109 \pm$<br>0.043              | 1.6                                                          |                      |                                     |    |
| $D_s[\text{FSI}]^-$<br>$/10^{-12}\cdot\text{m}^2\cdot\text{s}^{-1}$ | 5                  | $2.841 \pm$<br>0.010 | $-1.087 \pm$<br>0.016               | 0.6                                                          |                      |                                     |    |
|                                                                     | 25                 | $3.642 \pm$<br>0.002 | $-0.9052 \pm$<br>0.004              | 0.2                                                          | $3.655 \pm$<br>0.080 | $-0.6780 \pm$<br>0.041              | 7  |
|                                                                     | 40                 | $4.115 \pm$<br>0.002 | $-0.7976 \pm$<br>0.004              | 0.2                                                          | $4.022 \pm$<br>0.075 | $-0.6204 \pm$<br>0.038              | 6  |
|                                                                     | 60                 | $4.621 \pm$<br>0.007 | $-0.6824 \pm$<br>0.011              | 0.4                                                          | $4.459 \pm$<br>0.070 | $-0.5515 \pm$<br>0.036              | 6  |
|                                                                     | 80                 | $5.018 \pm$<br>0.010 | $-0.5920 \pm$<br>0.016              | 0.6                                                          |                      |                                     |    |

**Table S9.** Coefficients of Eqn (14),  $\eta = \exp(a + b m_1)$ .

| Property                                                                     | $T/^{\circ}\text{C}$ | $a$               | $b/(\text{kg}\cdot\text{mol}^{-1})$ | average devn/% |
|------------------------------------------------------------------------------|----------------------|-------------------|-------------------------------------|----------------|
| $m_1 = 0$ to 0.9622<br>(this work and Hayamizu <i>et al.</i> <sup>27</sup> ) |                      |                   |                                     |                |
| $\eta/\text{mPa}\cdot\text{s}$                                               | 10                   | $4.239 \pm 0.028$ | $0.9695 \pm 0.050$                  | 2.1            |
|                                                                              | 25                   | $3.706 \pm 0.025$ | $0.8214 \pm 0.044$                  | 1.8            |
|                                                                              | 40                   | $3.262 \pm 0.021$ | $0.7136 \pm 0.038$                  | 1.6            |
|                                                                              | 60                   | $2.775 \pm 0.017$ | $0.6076 \pm 0.031$                  | 1.3            |
|                                                                              | 80                   | $2.375 \pm 0.018$ | $0.5298 \pm 0.031$                  | 1.3            |

**Table S10.** Coefficients of Eqn (14),  $\Lambda = \exp(a + b m_1)$ .

| Property                                                       | $T/^{\circ}\text{C}$ | $a$               | $b/(\text{kg}\cdot\text{mol}^{-1})$ | average devn/% |
|----------------------------------------------------------------|----------------------|-------------------|-------------------------------------|----------------|
| $m_1 = 0$ to 0.9622<br>(this work)                             |                      |                   |                                     |                |
| $\Lambda$<br>$/\mu\text{S}\cdot\text{m}^2\cdot\text{mol}^{-1}$ | 0                    | $4.417 \pm 0.052$ | $-1.302 \pm 0.083$                  | 3.1            |
|                                                                | 10                   | $4.809 \pm 0.050$ | $-1.175 \pm 0.080$                  | 3.0            |
|                                                                | 25                   | $5.298 \pm 0.050$ | $-1.025 \pm 0.080$                  | 3.0            |
|                                                                | 40                   | $5.704 \pm 0.046$ | $-0.9177 \pm 0.074$                 | 2.7            |
|                                                                | 60                   | $6.133 \pm 0.042$ | $-0.7971 \pm 0.068$                 | 2.5            |
|                                                                | 80                   | $6.740 \pm 0.028$ | $0.6859 \pm 0.046$                  | 1.7            |
